# Supplementary material
Source: publisher figshare collection journal article supplement (https://aacr.figshare.com/articles/dataset/_/23627191)
Supplement: Supplementary file 1 [file 41457910]

**Supplementary Table S1. Characteristics of studies included in the meta-analysis**

| First author                       | Year | Country       | Study design              | Study period                                                 | Follow-up (years)    | Sample size                | Baseline age (years)                                                                                                 | Males (%)                     | Sex hormones                                | Primary outcome |
|------------------------------------|------|---------------|---------------------------|--------------------------------------------------------------|----------------------|----------------------------|----------------------------------------------------------------------------------------------------------------------|-------------------------------|---------------------------------------------|-----------------|
|                                    |      |               |                           |                                                              |                      | N (case/control, or event) |                                                                                                                      |                               |                                             |                 |
| Ming-Whei Yu <sup>1</sup>          | 1993 | China         | Nested case-control study | Taiwan community-based study (1984-1990)                     | 6, mean 4.6          | 175 (35/140)               | HBsAg-negative:<br>Cases: 58.3±9.8<br>Controls: 60.1±8.8<br>HBsAg-positive:<br>Cases: 59.2±9.2<br>Controls: 58.6±8.9 | All men (100)                 | Testosterone                                | HCC             |
| Jian-Min Yuan <sup>2</sup>         | 1995 | China         | Nested case-control study | Shanghai male residents cohort (1986-1993)                   | 7, mean 5.3          | 486 (76/410)               | 45-64                                                                                                                | All men (100)                 | Testosterone                                | HCC             |
| Nathalie Ganne-Carrie <sup>3</sup> | 1997 | France        | Cohort study              | HCC screening study in males with cirrhosis (1987-1992)      | 5, mean 3.2          | 101 cirrhosis (HCC: 29)    | 56.3±10.5                                                                                                            | All men (100)                 | SHBG                                        | HCC             |
| Anthony J. Alberg <sup>4</sup>     | 2000 | United States | Nested case-control study | Washington County serum bank and cancer registry (1974-1991) | 17, mean 9           | 234 (117/117)              | ≤44 (8.5%)<br>45-54 (30.8%)<br>55-64 (35.0%)<br>≥65 (25.6%)                                                          | Cases: 41.9<br>Controls: 41.9 | DHEA, DHEAS                                 | CC              |
| Keitaro Tanaka <sup>5</sup>        | 2000 | Japan         | Cohort study              | Japan cirrhosis cohort in                                    | 10, mean 5.1, median | 46 cirrhosis (HCC: 20)     | Median 56                                                                                                            | All men (100)                 | Testosterone, free testosterone, estradiol, | HCC             |

|                                |      |               |                           |                                                                      |                                     |                                                                                |                                                                                          |                      |                                                                      |             |
|--------------------------------|------|---------------|---------------------------|----------------------------------------------------------------------|-------------------------------------|--------------------------------------------------------------------------------|------------------------------------------------------------------------------------------|----------------------|----------------------------------------------------------------------|-------------|
|                                |      |               |                           | Kyushu University Hospital (1985-1995)                               | 4.4                                 |                                                                                |                                                                                          |                      | SHBG, testosterone: estradiol ratio                                  |             |
| Ming-Whei Yu <sup>6</sup>      | 2001 | China         | Nested case-control study | Taiwan male HBV carriers cohort study (1988-2000)                    | 12, mean 4.8 (time to diagnosis)    | 357 (119/238)                                                                  | Cases: 50.6±9.3<br>Controls: 50.3±9.0                                                    | All men (100)        | Testosterone, estradiol, testosterone/estradiol ratio                | HCC         |
| Marc J. Gunter <sup>7</sup>    | 2008 | United States | Case-cohort study         | Women's Health Initiative Observational Study (1993-2004)            | 11, mean 6.4                        | 1,247 (438/809)                                                                | Cases: 65.93±7.2<br>Subcohort: 62.78±7.5                                                 | Postmenopausal women | Estradiol                                                            | CRC         |
| Tess V. Clendenen <sup>8</sup> | 2009 | United States | Nested case-control study | New York University Women's Health Study (1985-2003)                 | 18, median 10.7 (time to diagnosis) | CRC: 441 (148/293)<br>Colon cancer: 372 (125/247)<br>Rectal cancer: 69 (23/46) | Cases: median 60.4<br>Controls: median 60.4                                              | Postmenopausal women | Estrone, estradiol, SHBG                                             | CC, RC, CRC |
| Jennifer H Lin <sup>9</sup>    | 2013 | United States | Nested case-control study | NHS (1976-2008), WHS (1992-2008), HPFS (1986-2008), and PHSII (1997- | 32, 16, 22, 11                      | 1158 men (439/719)<br>730 postmenopausal women (293/437)                       | Men (cases: 67.2±8.6<br>controls: 66.7±8.6)<br>Women (cases: 62.7±5.8<br>controls: 62.2) | 1158 (61.33)         | Estrone, estradiol, testosterone, SHBG, estradiol/testosterone ratio | CRC         |

|                                    |      |                    |                           |                                                      |                                    |                  |                                             |                      |                                                                |                                           |
|------------------------------------|------|--------------------|---------------------------|------------------------------------------------------|------------------------------------|------------------|---------------------------------------------|----------------------|----------------------------------------------------------------|-------------------------------------------|
|                                    |      |                    |                           | 2008)                                                |                                    |                  | ±5.5)                                       |                      |                                                                |                                           |
| Annekatriin Lukanova <sup>10</sup> | 2014 | European countries | Nested case-control study | EPIC (1992-2006)                                     | 14, median 4.7 (time to diagnosis) | 372 (125/247)    | Median 60.6                                 | 253 (68)             | Testosterone, free testosterone, SHBG                          | HCC                                       |
| D. D Ørsted <sup>11</sup>          | 2014 | Denmark            | Cohort study              | Copenhagen City Heart Study (1981–2009)              | 28, median 22                      | 8,771 (1,949)    | 20-94                                       | 4,453 (50.77)        | Testosterone                                                   | Any cancer (including EC, GC, LC, PC, CC) |
| Roni T. Falk <sup>12</sup>         | 2015 | United States      | Case-cohort study         | B~FIT (1992-2004)                                    | 12, median 10.3                    | 688 (187/501)    | Cases: 69.8±5.6<br>Subcohort: 67.3±6.2      | Postmenopausal women | Estrone, estradiol                                             | CRC                                       |
| Neil Murphy <sup>13</sup>          | 2015 | United States      | Nested case-control study | Women's Health Initiative Clinical Trial (1993-2008) | 15                                 | 1,203 (401/802)  | Cases: median 66.0<br>Controls: median 66.0 | Postmenopausal women | Estrone, free estradiol, total estradiol, progesterone, SHBG   | CC, RC, CRC                               |
| Yi X. Chan <sup>14</sup>           | 2017 | Australia          | Cohort study              | Health in Men Study (2001-2013)                      | 12, median 9.1                     | 3,690 (CRC: 137) | 77.0±3.6                                    | All men (100)        | Testosterone, free testosterone, DHT, estradiol, LH, SHBG      | CRC                                       |
| Yi X. Chan <sup>15</sup>           | 2018 | Australia          | Cohort study              | Busselton Health Study (1994-2014)                   | 20                                 | 1574 (CRC: 48)   | 51.1±14.7                                   | All men (100)        | Testosterone, DHT, estradiol, LH, SHBG                         | Overall cancer, CRC                       |
| Nagisa Mori <sup>16</sup>          | 2019 | Japan              | Nested case-control study | JPHC Study Cohort II (1998-2012)                     | 14, mean 12                        | 546 (185/361)    | Cases: 60.0±5.8<br>Controls: 59.8±6.0       | Postmenopausal women | Estradiol, SHBG, progesterone, testosterone, free testosterone | CRC                                       |

|                                  |      |                |                           |                                                  |                |                                           |                                       |                      |                                                                                                                                                                                                                                        |              |
|----------------------------------|------|----------------|---------------------------|--------------------------------------------------|----------------|-------------------------------------------|---------------------------------------|----------------------|----------------------------------------------------------------------------------------------------------------------------------------------------------------------------------------------------------------------------------------|--------------|
| Jessica L. Petrick <sup>17</sup> | 2019 | United States  | Nested case-control study | PLCO (1993-NA), ATBC (1985-NA), CPS-II (1982-NA) | Median 8.4     | 518 (259/259)                             | Cases: 62.0±6.6<br>Controls: 61.0±6.6 | All men (100)        | DHEA, androstenedione, testosterone, DHT, estrone, estradiol, SHBG, parent estrogens, testosterone: parent estrogens ratio, androstenedione: estrone ratio, testosterone: estradiol ratio, free testosterone, free DHT, free estradiol | EAC, GCA     |
| Jessica L. Petrick <sup>18</sup> | 2020 | United States  | Nested case-control study | Liver Cancer Pooling Project (1964-2010)         | 16-45          | 617 (191/426)                             | Cases: 62.8±7.2<br>Controls: 62.5±6.9 | Postmenopausal women | Estradiol, estrone, testosterone, DHEA, 4-androstenedione, 5-androstenediol, SHBG, free estradiol, free testosterone, testosterone/estradiol ratio, free testosterone/free estradiol, androstenedione/estrone                          | LC, HCC, ICC |
| Rita Peila <sup>19</sup>         | 2020 | United Kingdom | Cohort study              | UK Biobank (2006-2016)                           | 10, median 7.1 | 425,614 (CRC: 3,247; colon cancer: 2,376; | 40-69                                 | 206,508 (48.52)      | Testosterone, free testosterone, estradiol, free estradiol,                                                                                                                                                                            | CC, RC, CRC  |

|                                    |      |                |                           |                                      |                            |                                                    |                                        |                                           |                                                                                                                                                                     |                                                   |
|------------------------------------|------|----------------|---------------------------|--------------------------------------|----------------------------|----------------------------------------------------|----------------------------------------|-------------------------------------------|---------------------------------------------------------------------------------------------------------------------------------------------------------------------|---------------------------------------------------|
|                                    |      |                |                           |                                      |                            | rectal cancer:<br>871)                             |                                        |                                           | estradiol/testosterone<br>ratio, SHBG                                                                                                                               |                                                   |
| Rita Peila <sup>20</sup>           | 2020 | United Kingdom | Cohort study              | UK Biobank (2006-2016)               | 10, median<br>7.1          | 425,793<br>(pancreatic cancer: 225)                | 40–69                                  | Pancreas cancer (59.4)<br>Noncases (46.4) | Total testosterone, free testosterone, SHBG                                                                                                                         | PC                                                |
| Shao-Hua Xie <sup>21</sup>         | 2020 | Norway         | Nested case-control study | Janus Serum Bank Cohort (1970s-2016) | 41, mean<br>24.4           | 488 (244/244)                                      | Cases: 42.2±7.2<br>Controls: 42.1±4.1  | All men (100)                             | SHBG, DHEAS, FSH, LH, prolactin, testosterone, 17-OH progesterone, progesterone, estradiol, androstenedione, testosterone: estradiol ratio, free testosterone index | EAC                                               |
| Terry Cheuk-Fung Yip <sup>22</sup> | 2020 | China          | Cohort study              | CDARS (2000-2017)                    | 17, median<br>10.7         | 928 CHB patients with DM (HCC: 83)                 | 53.5 ± 10.9                            | All men (100)                             | Testosterone                                                                                                                                                        | HCC                                               |
| Una C. McMenamin <sup>23</sup>     | 2021 | United Kingdom | Cohort study              | UK Biobank (2006-2016)               | 10                         | 366,605 (EAC: 376; ESCC: 108; GC: 333; CRC: 2,868) | 40–69                                  | 219,425 (59.85)                           | Testosterone, free testosterone, estradiol, SHBG                                                                                                                    | EAC, ESCC, GC (cardia or non-cardia), CC, RC, CRC |
| Kara A. Michels <sup>24</sup>      | 2021 | United States  | Case-cohort study         | B~FIT (1992-2004)                    | 12, mean<br>10.2 (SD: 2.2) | 682 (187/495)                                      | Cases: 70.0±5.6<br>Subcohort: 67.2±6.2 | Postmenopausal women                      | Pregnenolone, progesterone, progesterone: estradiol                                                                                                                 | CRC                                               |
| Nagisa Mori <sup>25</sup>          | 2021 | European       | Nested case-              | EPIC (1992-                          | Median 13.9                | 1,028 (512/516)                                    | EPIC                                   | Postmenopa                                | Estrone, estradiol, free                                                                                                                                            | CC                                                |

|                                |      |                    |                           |                                 |                                 |                  |                                                                                             |                 |                                                                                                                              |                                                                 |
|--------------------------------|------|--------------------|---------------------------|---------------------------------|---------------------------------|------------------|---------------------------------------------------------------------------------------------|-----------------|------------------------------------------------------------------------------------------------------------------------------|-----------------------------------------------------------------|
|                                |      | countries          | control study             | NA), NSHDS (1985-NA)            |                                 |                  | (Cases: 62.0±5.4<br>Controls: 61.9±5.4)<br>NSHDS<br>(Cases: 60.4±2.1<br>Controls: 60.3±2.0) | usal women      | estradiol, testosterone, free testosterone, estradiol-to-testosterone ratio, androstenedione, DHEA, progesterone, SHBG       |                                                                 |
| Eleanor L. Watts <sup>26</sup> | 2021 | United Kingdom     | Cohort study              | UK Biobank (2006-2016)          | 10, mean 7.0                    | 304,720 (15,151) | Men:56.13±8.22<br>Postmenopausal women: 60.15±5.29                                          | 182,608 (59.93) | Testosterone, free testosterone, SHBG                                                                                        | 19 types of cancer (including EC, EAC, GC, LC, PC, CC, RC, CRC) |
| Zhikai Zhu <sup>27</sup>       | 2021 | China              | Nested case-control study | NIT (1991-2006)                 | 15, median 12.25                | 656 (328/328)    | Median 56.0                                                                                 | All men (100)   | Androstenedione, testosterone, free and bioavailable testosterone, estradiol, estrone, free and bioavailable estradiol, SHBG | Non-cardia GC                                                   |
| Justin Harbs <sup>28</sup>     | 2022 | European countries | Nested case-control study | EPIC (1992-NA), NSHDS (1985-NA) | Median 10.6 (time to diagnosis) | 1,380 (690/690)  | Cases: median 58.0,<br>Controls: median 57.7                                                | All men (100)   | Estrone, estradiol, free estradiol, testosterone, free testosterone, androstenedione, DHEA, progesterone, SHBG               | CC                                                              |

|                            |      |                |              |                        |                    |                     |                                                                                                    |                   |                                                                        |                          |
|----------------------------|------|----------------|--------------|------------------------|--------------------|---------------------|----------------------------------------------------------------------------------------------------|-------------------|------------------------------------------------------------------------|--------------------------|
| Muktar Ahmed <sup>29</sup> | 2023 | United Kingdom | Cohort study | UK Biobank (2006-2016) | 10, median<br>3.87 | 290,888<br>(21,973) | 39–49 years:<br>67,723 (23.3),<br>50–59 years:<br>97,865 (33.6),<br>60–73 years:<br>125,300 (43.1) | 138,327<br>(47.6) | Testosterone, free<br>testosterone, estradiol,<br>free estradiol, SHBG | LC, HCC,<br>ICC, PC, CRC |
|----------------------------|------|----------------|--------------|------------------------|--------------------|---------------------|----------------------------------------------------------------------------------------------------|-------------------|------------------------------------------------------------------------|--------------------------|

**Abbreviations:** ATBC, Alpha-Tocopherol, Beta-Carotene Cancer Prevention Study; B-FIT, Breast and Bone Follow-up to the Fracture Intervention Trial; CC, colon cancer; CDARS, Clinical Data Analysis and Reporting System; CHB, chronic hepatitis B; CPS-II, Cancer Prevention Study II Nutrition Cohort; CRC, colorectal cancer; DHEA, dehydroepiandrosterone; DHEAS, dehydroepiandrosterone sulfate; DHT, dihydrotestosterone; DM, diabetes mellitus; EAC, esophageal adenocarcinoma; EC, esophageal cancer; ESCC, esophageal squamous cell carcinoma; EPIC, European Prospective Investigation into Cancer and Nutrition; FSH, follicle-stimulating hormone; GC, gastric cancer; GCA, gastric cardia adenocarcinoma; HBV, hepatitis B virus; HBsAg, hepatitis B surface antigen; HCC, hepatocellular carcinoma; HPFS, Health Professional Follow-up Study; ICC, intrahepatic cholangiocarcinoma; JPHC, Japan Public Health Center-based Prospective Study; LC, liver cancer; LH, luteinizing hormone; NA, not available; NHS, Nurses' Health Study; NIT, Linxian Nutrition Intervention Trial; NSHDS, Northern Sweden Health and Disease Study; PC, pancreatic cancer; PHSII, Physicians' Health Study II; PLCO, Prostate, Lung, Colorectal, and Ovarian Cancer Screening Trial; RC, rectal cancer; SHBG, sex hormone-binding globulin; WHS, Women's Health Study.

## References

1. Yu MW, Chen CJ. Elevated serum testosterone levels and risk of hepatocellular carcinoma. *Cancer Res* 1993;53(4):790–4.
2. Yuan JM, Ross RK, Stanczyk FZ, et al. A cohort study of serum testosterone and hepatocellular carcinoma in Shanghai, China. *Int J Cancer* 1995;63(4):491–3.
3. Ganne-Carrie N, Chastang C, Uzzan B, et al. Predictive value of serum sex hormone binding globulin for the occurrence of hepatocellular carcinoma in male patients with cirrhosis. *J Hepatol* 1997;26(1):96–102.
4. Alberg AJ, Gordon GB, Hoffman SC, et al. Serum dehydroepiandrosterone and dehydroepiandrosterone sulfate and the subsequent risk of developing colon cancer. *Cancer Epidemiol Biomarkers Prev* 2000;9(5):517–21.
5. Tanaka K, Sakai H, Hashizume M, et al. Serum testosterone:estradiol ratio and the development of hepatocellular carcinoma among male cirrhotic patients. *Cancer Res* 2000;60(18):5106–10.
6. Yu MW, Yang YC, Yang SY, et al. Hormonal markers and hepatitis B virus-related hepatocellular carcinoma risk: a nested case-control study among men. *J Natl Cancer Inst* 2001;93(21):1644–51.
7. Gunter MJ, Hoover DR, Yu H, et al. Insulin, insulin-like growth factor-I, endogenous estradiol, and risk of colorectal cancer in postmenopausal women. *Cancer Res* 2008;68(1):329–37.
8. Clendenen TV, Koenig KL, Shore RE, et al. Postmenopausal levels of endogenous sex hormones and risk of colorectal cancer. *Cancer Epidemiol Biomarkers Prev* 2009;18(1):275–81.
9. Lin JH, Zhang SM, Rexrode KM, et al. Association between sex hormones and colorectal cancer risk in men and women. *Clin Gastroenterol Hepatol* 2013;11(4):419-424.e1.
10. Lukanova A, Becker S, Husing A, et al. Prediagnostic plasma testosterone, sex hormone-binding globulin, IGF-I and hepatocellular carcinoma: etiological factors or risk markers? *Int J Cancer* 2014;134(1):164–73.
11. Orsted DD, Nordestgaard BG, Bojesen SE. Plasma testosterone in the general population, cancer prognosis and cancer risk: a prospective cohort study. *Ann Oncol* 2014;25(3):712–8.
12. Falk RT, Dallal CM, Lacey JV, et al. Estrogen Metabolites Are Not Associated with Colorectal Cancer Risk in Postmenopausal Women. *Cancer Epidemiol Biomarkers Prev* 2015;24(9):1419–22.
13. Murphy N, Strickler HD, Stanczyk FZ, et al. A Prospective Evaluation of Endogenous Sex Hormone Levels and Colorectal Cancer Risk in Postmenopausal



Women. *J Natl Cancer Inst* 2015;107(10):djv210.

14. Chan YX, Alfonso H, Chubb SAP, et al. Higher Dihydrotestosterone Is Associated with the Incidence of Lung Cancer in Older Men. *Horm Cancer* 2017;8(2):119–26.
15. Chan YX, Knuiaman MW, Divitini ML, et al. Lower Circulating Androgens Are Associated with Overall Cancer Risk and Prostate Cancer Risk in Men Aged 25–84 Years from the Busselton Health Study. *Horm Cancer* 2018;9(6):391–8.
16. Mori N, Sawada N, Iwasaki M, et al. Circulating sex hormone levels and colorectal cancer risk in Japanese postmenopausal women: The JPHC nested case-control study. *Int J Cancer* 2019;145(5):1238–44.
17. Petrick JL, Hyland PL, Caron P, et al. Associations Between Prediagnostic Concentrations of Circulating Sex Steroid Hormones and Esophageal/Gastric Cardia Adenocarcinoma Among Men. *J Natl Cancer Inst* 2019;111(1):34–41.
18. Petrick JL, Florio AA, Zhang X, et al. Associations Between Prediagnostic Concentrations of Circulating Sex Steroid Hormones and Liver Cancer Among Postmenopausal Women. *Hepatology* 2020;72(2):535–47.
19. Peila R, Arthur RS, Rohan TE. Sex hormones, SHBG and risk of colon and rectal cancer among men and women in the UK Biobank. *Cancer Epidemiol* 2020;69:101831.
20. Peila R, Arthur RS, Rohan TE. Association of Sex Hormones with Risk of Cancers of the Pancreas, Kidney, and Brain in the UK Biobank Cohort Study. *Cancer Epidemiol Biomarkers Prev* 2020;29(9):1832–6.
21. Xie SH, Ness-Jensen E, Rabbani S, et al. Circulating Sex Hormone Levels and Risk of Esophageal Adenocarcinoma in a Prospective Study in Men. *Am J Gastroenterol* 2020;115(2):216–23.
22. Yip TC, Wong GL, Chan HL, et al. Elevated testosterone increases risk of hepatocellular carcinoma in men with chronic hepatitis B and diabetes mellitus. *J Gastroenterol Hepatol* 2020;35(12):2210–9.
23. McMenamin UC, Liu P, Kunzmann AT, et al. Circulating Sex Hormones Are Associated With Gastric and Colorectal Cancers but Not Esophageal Adenocarcinoma in the UK Biobank. *Am J Gastroenterol* 2021;116(3):522–9.
24. Michels KA, Geczik AM, Bauer DC, et al. Endogenous Progestogens and Colorectal Cancer Risk among Postmenopausal Women. *Cancer Epidemiol Biomarkers Prev* 2021;30(6):1100–5.
25. Mori N, Keski-Rahkonen P, Gicquiau A, et al. Endogenous Circulating Sex Hormone Concentrations and Colon Cancer Risk in Postmenopausal Women: A Prospective Study and Meta-Analysis. *JNCI Cancer Spectr* 2021;5(6):pkab084.
26. Watts EL, Perez-Cornago A, Knuppel A, et al. Prospective analyses of testosterone and sex hormone-binding globulin with the risk of 19 types of cancer in men

and postmenopausal women in UK Biobank. *Int J Cancer* 2021;149(3):573–84.

27. Zhu Z, Chen Y, Ren J, et al. Serum Levels of Androgens, Estrogens, and Sex Hormone Binding Globulin and Risk of Primary Gastric Cancer in Chinese Men: A Nested Case-Control Study. *Cancer Prev Res (Phila)* 2021;14(6):659–66.
28. Harbs J, Rinaldi S, Gicquiau A, et al. Circulating Sex Hormone Levels and Colon Cancer Risk in Men: A Nested Case-Control Study and Meta-Analysis. *Cancer Epidemiol Biomarkers Prev* 2022;31(4):793–803.
29. Ahmed M, Mäkinen V-P, Lumsden A, et al. Metabolic profile predicts incident cancer: A large-scale population study in the UK Biobank. *Metabolism* 2023;138:155342.
